# Supplementary material for: Intrinsic and extrinsic defects build a novel mechanoluminescent phosphor Na2MgGeO4:Mn2+
Source: Royal Society of Chemistry journal article supplement (doi:10.1039/d0tc05582d), 2021-01-01
Supplement: d0tc05582d2.pdf [file d0tc05582d2.pdf]

## Electronic Supplementary Information

### Intrinsic and extrinsic defects build a novel mechanoluminescent phosphor $\text{Na}_2\text{MgGeO}_4:\text{Mn}^{2+}$

Zhongzhong Zheng,<sup>a</sup> Yuxing Bai,<sup>a</sup> Yijie Ren,<sup>a</sup> Huimin Chen,<sup>a</sup> Li Wu,<sup>\*a</sup> Yongfa Kong,<sup>a</sup> Yi Zhang <sup>\*b</sup> and Jingjun Xu <sup>a</sup>

<sup>a</sup>Key Laboratory of Weak-Light Nonlinear Photonics, Ministry of Education, School of Physics, Nankai University, Tianjin 300071, China. E-mail: \*lwu@nankai.edu.cn.

<sup>b</sup>College of Electronic Information and Optical Engineering and Tianjin Key Laboratory of Photo-electronic Thin Film Devices and Technology, Nankai University, Tianjin 300071, China. E-mail: \*yizhang@nankai.edu.cn.

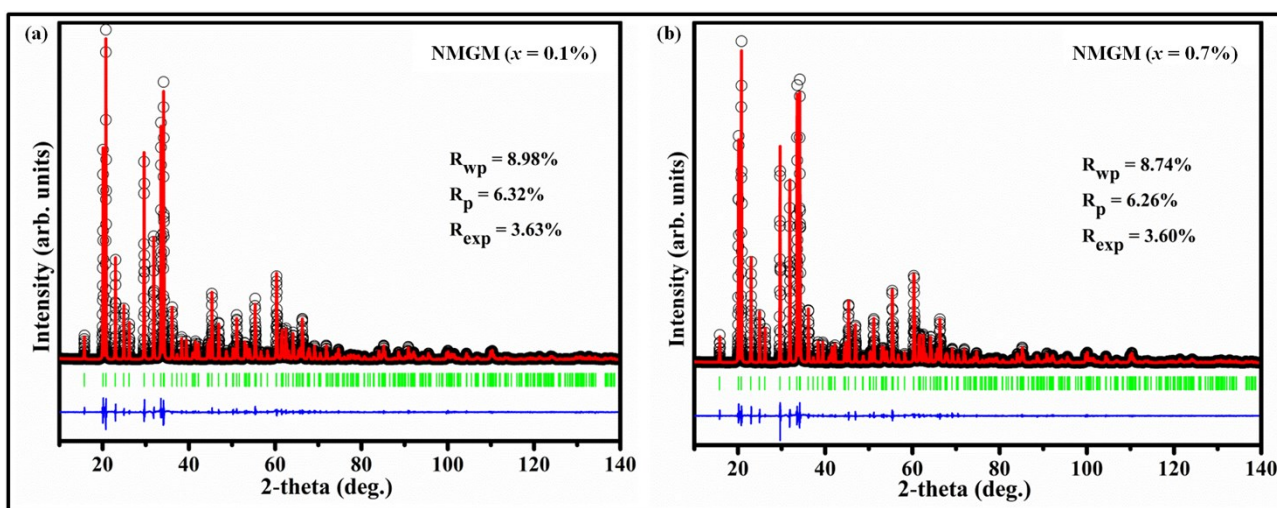

**Fig. S1** The Rietveld refinement of the XRD profiles of  $\text{Na}_2\text{MgGeO}_4:\text{xMn}^{2+}$  ( $x = 0.1\%$  and  $0.7\%$ ). Small black circles and the red continuous lines represent the experimental and the calculated values respectively; vertical bars indicate the position of Bragg peaks. The blue bottom trace depicts the corresponding residuals between the experimental and the calculated intensity values.

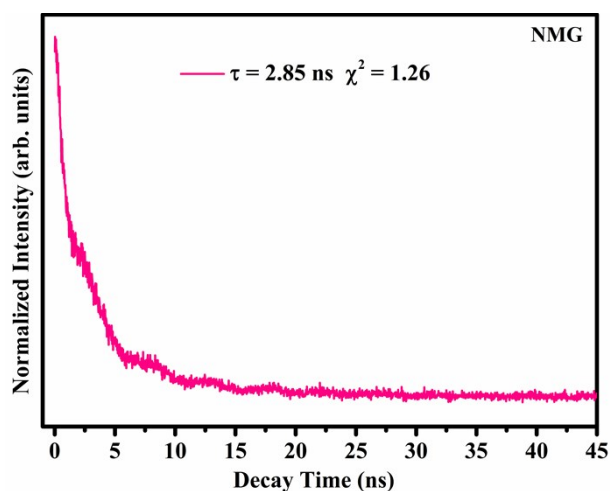

Fig. S2 Decay curves of  $\text{Na}_2\text{MgGeO}_4$  at room temperature ( $\lambda_{\text{ex}} = 272 \text{ nm}$  and  $\lambda_{\text{em}} = 518 \text{ nm}$ ).

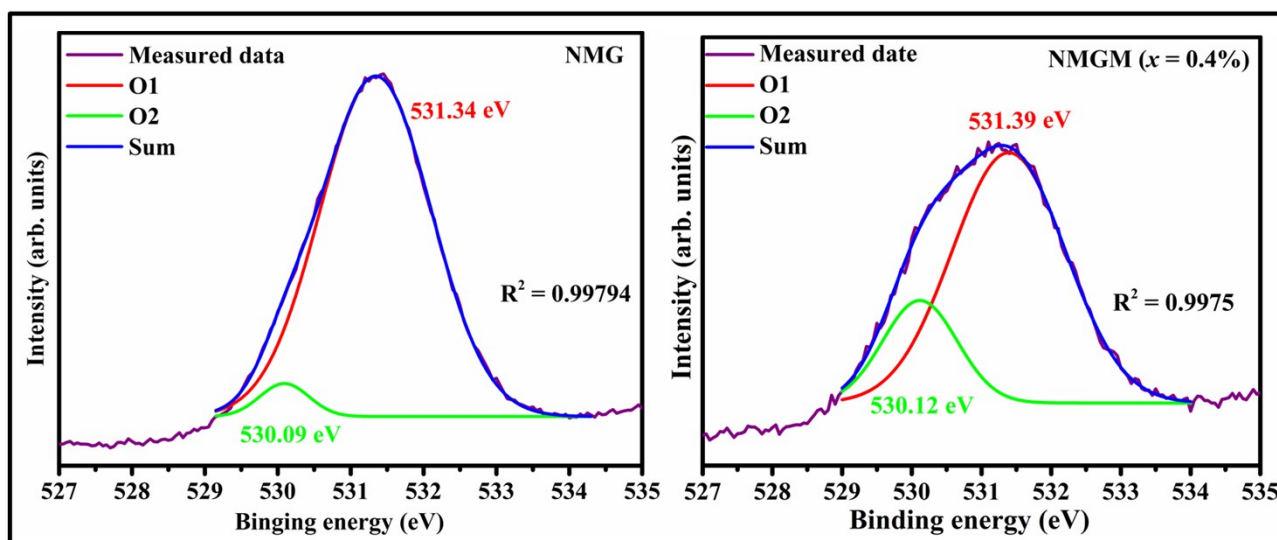

Fig. S3 The high-resolution XPS spectra of O 1s for  $\text{Na}_2\text{MgGeO}_4$  and  $\text{Na}_2\text{MgGeO}_4:x\text{Mn}^{2+}$  ( $x = 0.4\%$ ).

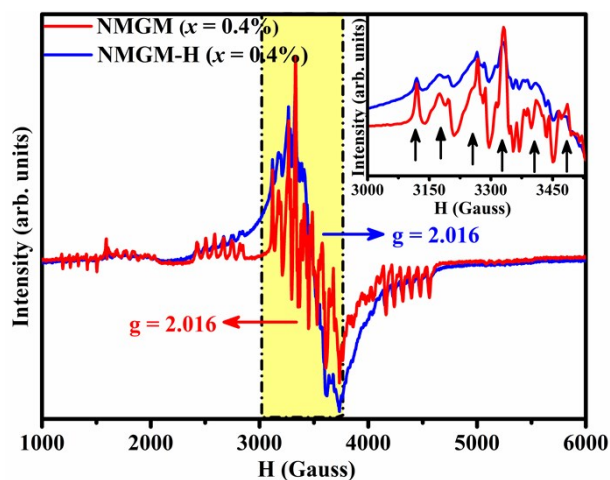

Fig. S4 The X-band powered EPR spectra of  $\text{Mn}^{2+}$  ions for  $\text{Na}_2\text{MgGeO}_4:x\text{Mn}^{2+}$  ( $x = 0.4\%$ ) calcinated in ambient (NMG) and reducing atmosphere (NMG-H), respectively. The sextet hyperfine lines of  $\text{Mn}^{2+}$  ions in NMG-H is hardly distinguished because

of the higher  $\text{Mn}^{2+}$  concentration in reducing atmosphere, since the EPR measurement is more sensitive to the trace  $\text{Mn}^{2+}$  ions.<sup>1, 2</sup>

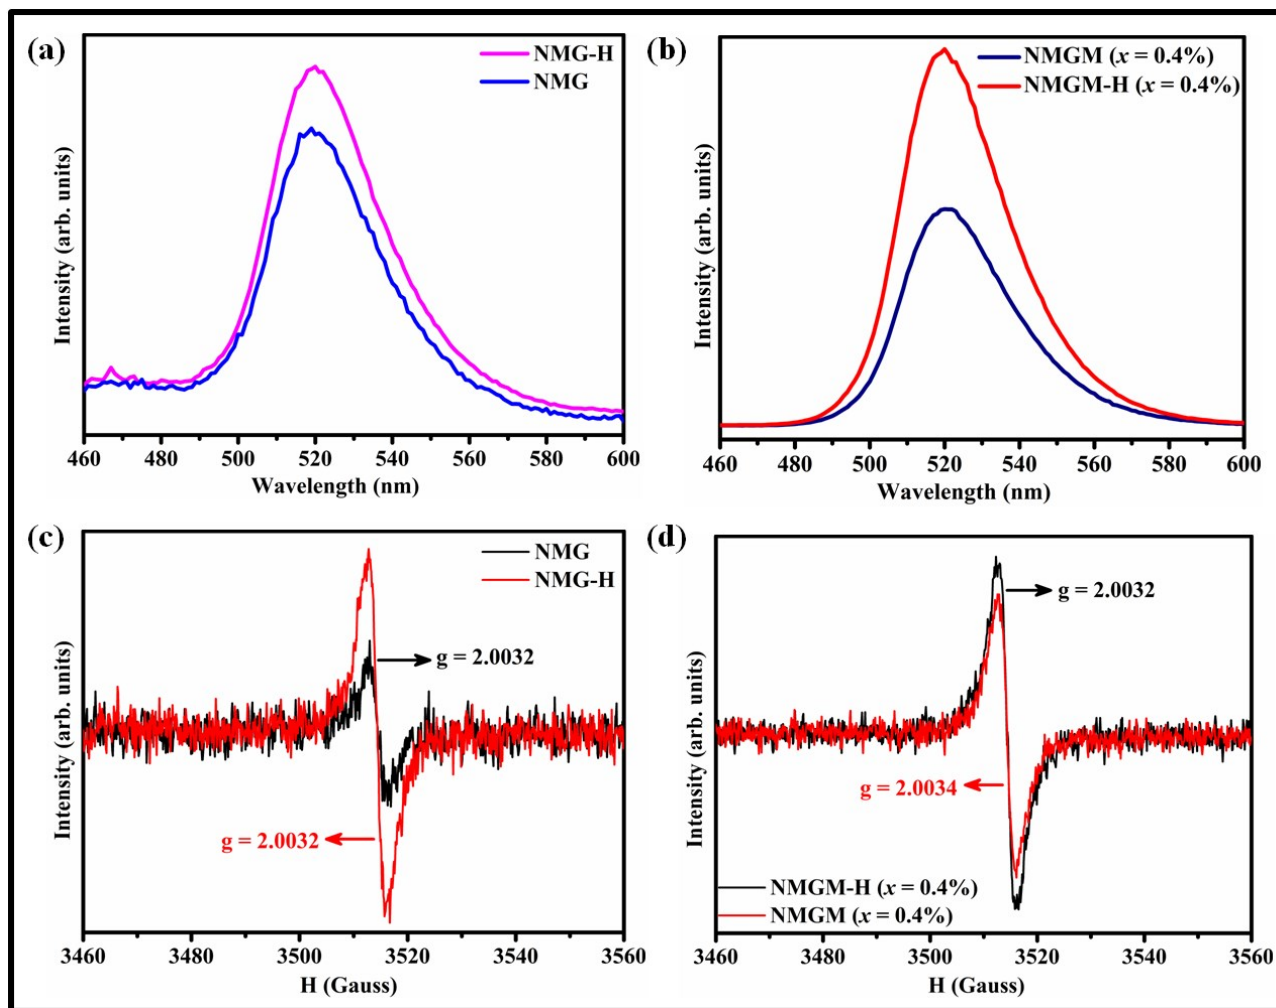

**Fig. S5** (a) The PL spectra of  $\text{Na}_2\text{MgGeO}_4$  calcinated in ambient and reducing atmosphere, respectively. (b) The PL spectra of  $\text{Na}_2\text{MgGeO}_4:x\text{Mn}^{2+}$  ( $x = 0.4\%$ ) calcinated in ambient and reducing atmosphere, respectively. (c) X-band powered EPR spectra of  $V_O$  for  $\text{Na}_2\text{MgGeO}_4$  calcinated in ambient and reducing atmosphere, respectively. (d) X-band powered EPR spectra of  $V_O$  for  $\text{Na}_2\text{MgGeO}_4:x\text{Mn}^{2+}$  ( $x = 0.4\%$ ) calcinated in ambient and reducing atmosphere, respectively.

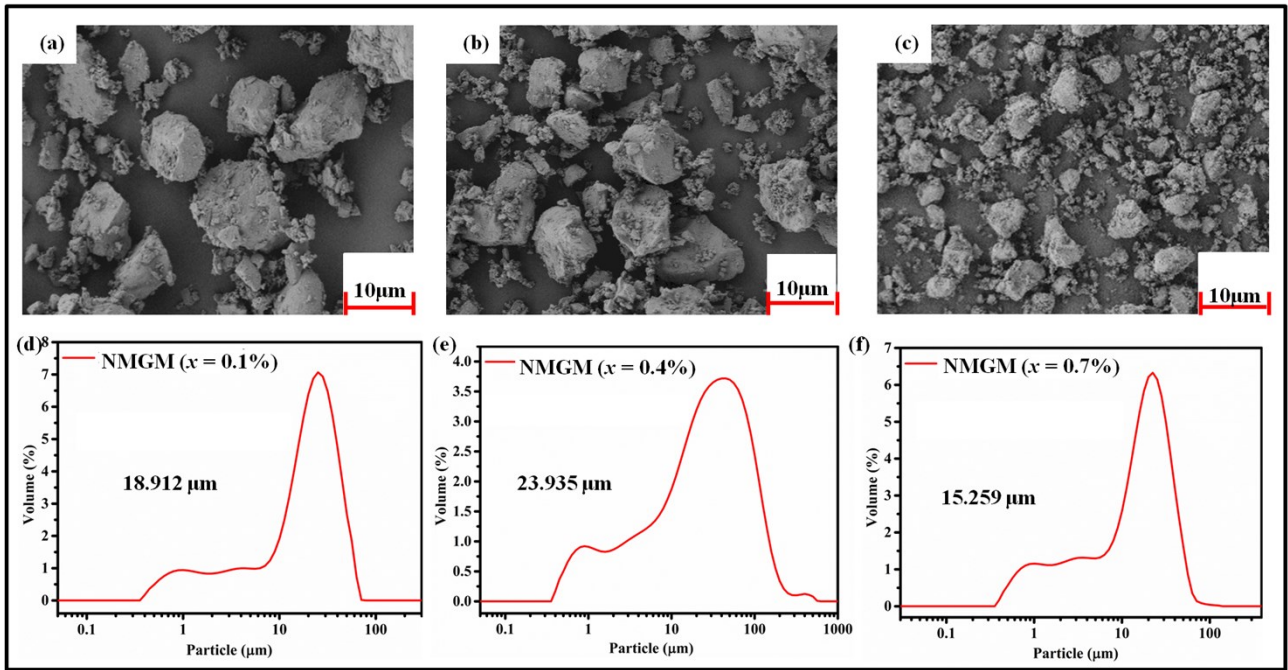

**Fig. S6** (a-c) SEM images of  $\text{Na}_2\text{MgGeO}_4 \cdot x\text{Mn}^{2+}$  ( $x = 0.1\%$ ,  $0.4\%$ ,  $0.7\%$ ). (d-f) Particle size distribution of  $\text{Na}_2\text{MgGeO}_4 \cdot x\text{Mn}^{2+}$  ( $x = 0.1\%$ ,  $0.4\%$ ,  $0.7\%$ ). Among them,  $\text{Na}_2\text{MgGeO}_4 \cdot 0.004\text{Mn}^{2+}$  has bigger average particle size, which signifies the better optical performances and coincides with the result of concentration quenching in Fig. 2e.<sup>3</sup>

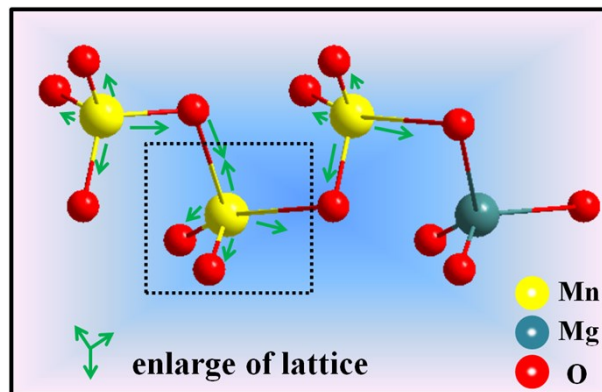

**Fig. S7** Local structure coordination of  $\text{Na}_2\text{MgGeO}_4 \cdot \text{Mn}^{2+}$ .  $\text{Mn}^{2+}$  ions at selected  $\text{Mg}^{2+}$  sites are proposed for neighboring cation substitution.

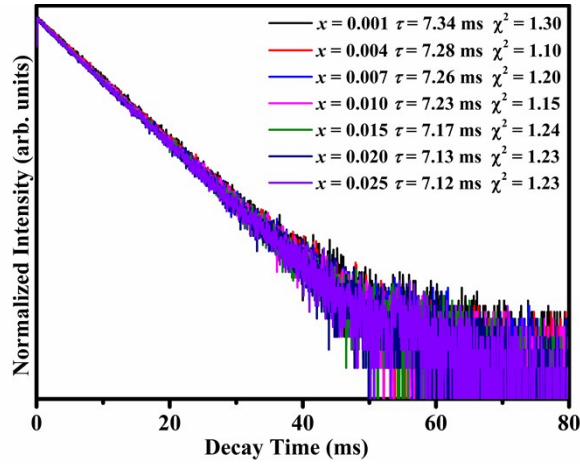

Fig. S8 Decay curves of  $\text{Na}_2\text{MgGeO}_4:x\text{Mn}^{2+}$  ( $0.001 \leq x \leq 0.025$ ) at room temperature ( $\lambda_{\text{ex}} = 280$  nm and  $\lambda_{\text{em}} = 518$  nm).

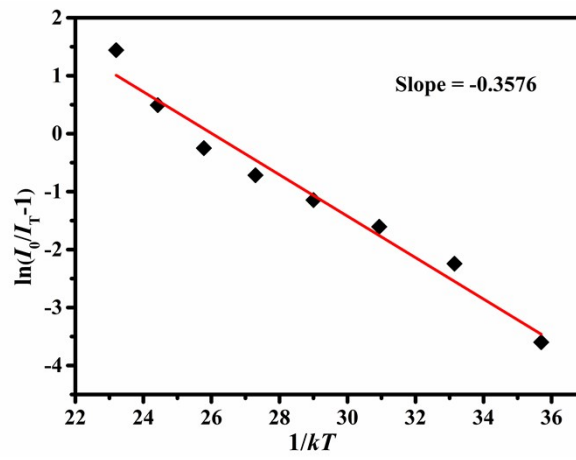

Fig. S9 The  $\ln(I_0/I_T - 1)$  vs.  $1/kT$  activation energy graph for thermal quenching of  $\text{Na}_2\text{MgGeO}_4:x\text{Mn}^{2+}$  ( $x = 0.4\%$ ).

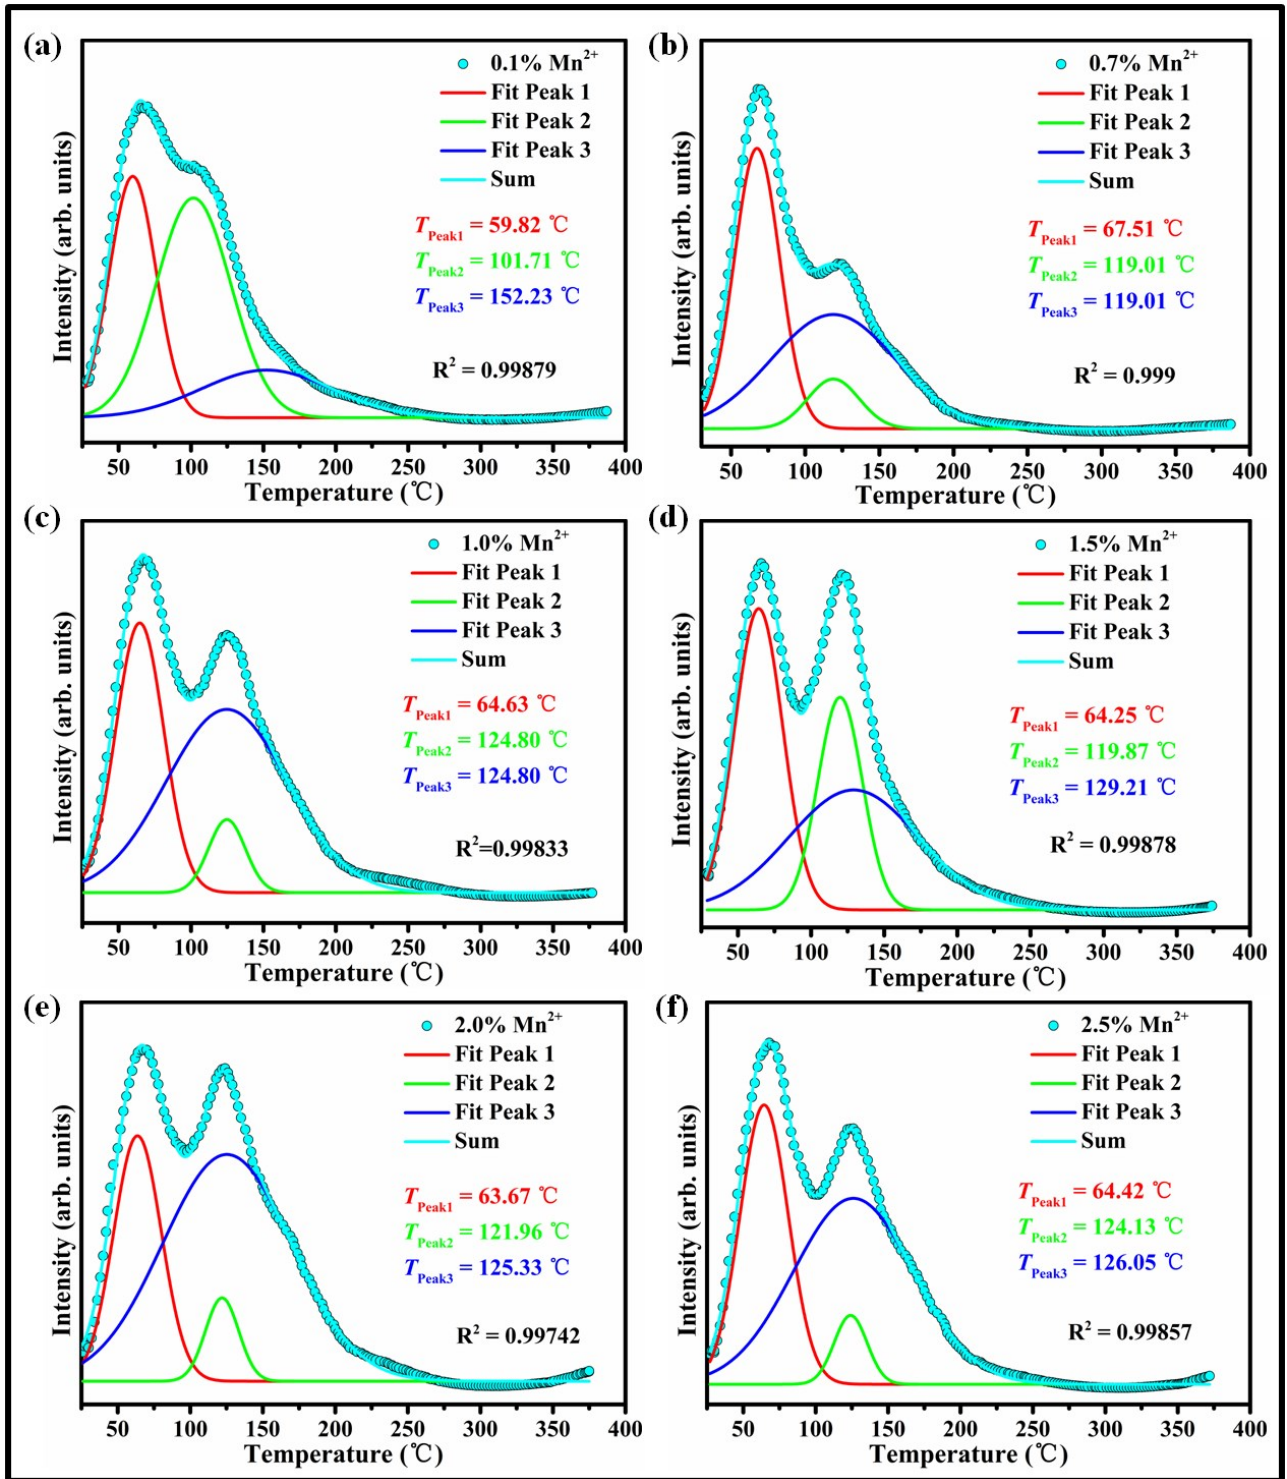

Fig. S10 Gaussian peak results of thermoluminescence curves of  $\text{Na}_2\text{MgGeO}_4:x\text{Mn}^{2+}$  ( $0 \leq x \leq 0.025$ ).

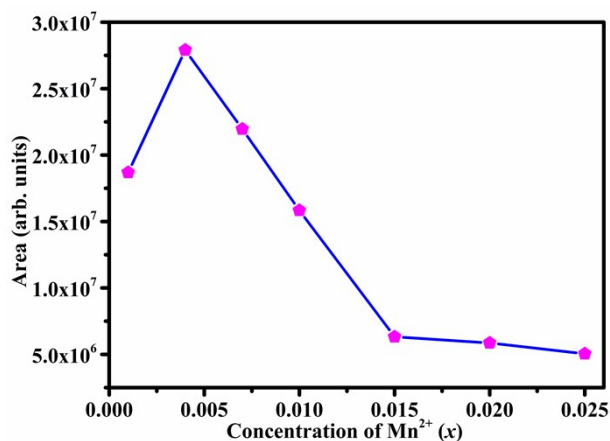

**Fig. S11** The integrated area versus Mn<sup>2+</sup> concentration of Na<sub>2</sub>MgGeO<sub>4</sub>:xMn<sup>2+</sup> ( $0 \leq x \leq 0.025$ ).

**Table S1** Lattice parameters and agreement factors for Na<sub>2</sub>MgGeO<sub>4</sub>:xMn<sup>2+</sup> ( $x = 0.4\%$ ) refined by Rietveld method, when Mn<sup>2+</sup> ions occupy all kinds of the cationic sites.

| Doped concentration      | $x = 0.004$  |
|--------------------------|--------------|
| Crystal system           | monoclinic   |
| Space group              | Pc           |
| $a$ (Å)                  | 5.34384(6)   |
| $b$ (Å)                  | 5.61866(6)   |
| $c$ (Å)                  | 8.92551(13)  |
| $\beta$ (deg)            | 126.8143(10) |
| Volume (Å <sup>3</sup> ) | 214.548(5)   |
| $Z$                      | 2            |
| $R_p$ (%)                | 7.01         |
| $R_{wp}$ (%)             | 9.72         |
| $R_{exp}$ (%)            | 3.65         |

**Table S2** Occupancy of Mn<sup>2+</sup> occupying all the cationic sites for Na<sub>2</sub>MgGeO<sub>4</sub>:xMn<sup>2+</sup> ( $x = 0.4\%$ ) refined by Rietveld method.

|     | site | $x$       | $y$        | $z$       | Occupancy |
|-----|------|-----------|------------|-----------|-----------|
| Na1 | 2a   | 0.511(7)  | 0.817(2)   | 0.425(3)  | 1.043(9)  |
| Mn1 | 2a   | 0.511(7)  | 0.817(2)   | 0.425(3)  | -0.043(9) |
| Na2 | 2a   | 0.742(5)  | 0.6756(14) | 0.169(3)  | 1.403(3)  |
| Mn2 | 2a   | 0.742(5)  | 0.6756(14) | 0.169(3)  | -0.403(3) |
| Mg  | 2a   | 0.018(7)  | 0.185(2)   | 0.425(4)  | 0.997(9)  |
| Mn3 | 2a   | 0.018(7)  | 0.185(2)   | 0.425(4)  | 0.003(9)  |
| Ge1 | 2a   | 0.2906(4) | 0.3147(5)  | 0.1943(3) | 0.9995(8) |
| Mn4 | 2a   | 0.2906(4) | 0.3147(5)  | 0.1943(3) | 0.0005(8) |
| O1  | 2a   | 0         | 0.149(3)   | 0         | 1.0       |
| O2  | 2a   | 0.165(6)  | 0.623(3)   | 0.162(3)  | 1.0       |
| O3  | 2a   | 0.350(7)  | 0.217(3)   | 0.400(3)  | 1.0       |
| O4  | 2a   | 0.576(6)  | 0.274(3)   | 0.157(4)  | 1.0       |

**Table S3** Lattice parameters and agreement factors for Na<sub>2</sub>MgGeO<sub>4</sub>:0.001Mn<sup>2+</sup>, Na<sub>2</sub>MgGeO<sub>4</sub>:0.004Mn<sup>2+</sup> and Na<sub>2</sub>MgGeO<sub>4</sub>:0.007Mn<sup>2+</sup> refined by Rietveld method.

| Doped concentration      | $x = 0.001$  | $x = 0.004$  | $x = 0.007$  |
|--------------------------|--------------|--------------|--------------|
| Crystal system           | monoclinic   | monoclinic   | monoclinic   |
| Space group              | Pc           | Pc           | Pc           |
| $a$ (Å)                  | 5.34585(10)  | 5.34632(8)   | 5.34572(12)  |
| $b$ (Å)                  | 5.61991(10)  | 5.62016(7)   | 5.61944(11)  |
| $c$ (Å)                  | 8.9234(2)    | 8.9237(2)    | 8.9240(3)    |
| $\beta$ (deg)            | 126.7590(12) | 126.7603(16) | 126.7641(16) |
| Volume (Å <sup>3</sup> ) | 214.781(8)   | 214.813(9)   | 214.757(10)  |
| $Z$                      | 2            | 2            | 2            |
| $R_p$ (%)                | 6.32         | 6.23         | 6.26         |
| $R_{wp}$ (%)             | 8.98         | 8.92         | 8.74         |
| $R_{exp}$ (%)            | 3.63         | 3.65         | 3.60         |

**Table S4** Refinement atomic positions for Na<sub>2</sub>MgGeO<sub>4</sub>:0.001Mn<sup>2+</sup>, Na<sub>2</sub>MgGeO<sub>4</sub>:0.004Mn<sup>2+</sup> and Na<sub>2</sub>MgGeO<sub>4</sub>:0.007Mn<sup>2+</sup>.

|                                                           | site | $x$ | $y$      | $z$        | $U_{eq}$ | Occupancy |          |
|-----------------------------------------------------------|------|-----|----------|------------|----------|-----------|----------|
| Na <sub>2</sub> MgGeO <sub>4</sub> :0.001Mn <sup>2+</sup> |      |     |          |            |          |           |          |
|                                                           | Na1  | 2a  | 0.482(5) | 0.817(2)   | 0.416(3) | 0.1(2)    | 1.0(4)   |
|                                                           | Na2  | 2a  | 0.743(6) | 0.6714(12) | 0.169(4) | 0.1(2)    | 1.0(4)   |
|                                                           | Mg1  | 2a  | 0.018(7) | 0.185(2)   | 0.425(4) | 0.2(3)    | 0.998(4) |
|                                                           | Mn1  | 2a  | 0.018(7) | 0.185(2)   | 0.425(4) | 0.2(3)    | 0.002(4) |
|                                                           | Ge1  | 2a  | 0.285(4) | 0.3148(5)  | 0.186(3) | 0.61(9)   | 1.0(4)   |
|                                                           | O1   | 2a  | 0        | 0.150(3)   | 0        | 0.6(2)    | 0.9(3)   |
|                                                           | O2   | 2a  | 0.173(6) | 0.617(2)   | 0.170(5) | 0.6(2)    | 0.9(3)   |
|                                                           | O3   | 2a  | 0.363(6) | 0.219(3)   | 0.408(3) | 0.6(2)    | 1.0(4)   |
|                                                           | O4   | 2a  | 0.631(5) | 0.280(3)   | 0.207(4) | 0.6(2)    | 0.9(3)   |
| Na <sub>2</sub> MgGeO <sub>4</sub> :0.004Mn <sup>2+</sup> |      |     |          |            |          |           |          |
|                                                           | Na1  | 2a  | 0.474(6) | 0.811(3)   | 0.415(4) | 0.003     | 1.0(3)   |
|                                                           | Na2  | 2a  | 0.741(7) | 0.6752(14) | 0.169(4) | 0.003     | 1.0(3)   |
|                                                           | Mg1  | 2a  | 0.018(7) | 0.184(2)   | 0.428(4) | 0.008     | 0.995(7) |
|                                                           | Mn1  | 2a  | 0.018(7) | 0.184(2)   | 0.428(4) | 0.008     | 0.005(7) |
|                                                           | Ge1  | 2a  | 0.279(5) | 0.3141(6)  | 0.187(3) | 0.60(9)   | 1.0(3)   |
|                                                           | O1   | 2a  | 0        | 0.153(4)   | 0        | 0.2(3)    | 0.9(3)   |
|                                                           | O2   | 2a  | 0.155(7) | 0.620(3)   | 0.157(4) | 0.2(3)    | 0.9(3)   |
|                                                           | O3   | 2a  | 0.351(6) | 0.211(4)   | 0.403(3) | 0.2(3)    | 0.9(3)   |
|                                                           | O4   | 2a  | 0.636(6) | 0.282(3)   | 0.215(5) | 0.2(3)    | 0.9(3)   |
| Na <sub>2</sub> MgGeO <sub>4</sub> :0.007Mn <sup>2+</sup> |      |     |          |            |          |           |          |
|                                                           | Na1  | 2a  | 0.502(7) | 0.823(3)   | 0.425(4) | 0.8(2)    | 1.0(7)   |
|                                                           | Na2  | 2a  | 0.760(9) | 0.6738(15) | 0.180(4) | 0.8(2)    | 1.0(7)   |
|                                                           | Mg1  | 2a  | 0.035(6) | 0.190(2)   | 0.433(4) | 0.5(3)    | 0.994(8) |
|                                                           | Mn1  | 2a  | 0.035(6) | 0.190(2)   | 0.433(4) | 0.5(3)    | 0.006(8) |
|                                                           | Ge1  | 2a  | 0.285(5) | 0.3142(5)  | 0.199(3) | 0.95(11)  | 1.0(7)   |



|    |    |          |          |          |        |        |
|----|----|----------|----------|----------|--------|--------|
| O1 | 2a | 0        | 0.153(4) | 0        | 0.8(3) | 1.0(7) |
| O2 | 2a | 0.203(8) | 0.635(3) | 0.213(7) | 0.8(3) | 0.9(7) |
| O3 | 2a | 0.361(6) | 0.231(4) | 0.422(3) | 0.8(3) | 1.0(7) |
| O4 | 2a | 0.638(6) | 0.283(4) | 0.221(5) | 0.8(3) | 0.9(6) |

**Table S5** The amounts of all the elements for the matrix through ICP-OES analysis.

| element | Na      | Mg     | Ge      | O       | Mn            |
|---------|---------|--------|---------|---------|---------------|
| wt. %   | 13.6651 | 9.7309 | 31.7675 | 44.4365 | no detectable |

**Table S6** Fitting results of Gaussian peaks of thermoluminescence curves of all the doped samples.

| Mn <sup>2+</sup> (mol. %) | Peak position (°C) |                    |                    | R <sup>2</sup> |
|---------------------------|--------------------|--------------------|--------------------|----------------|
|                           | T <sub>Peak1</sub> | T <sub>Peak2</sub> | T <sub>Peak3</sub> |                |
| 0.1                       | 59.82              | 101.71             | 152.23             | 0.99879        |
| 0.4                       | 67.22              | 113.07             | 126.03             | 0.99907        |
| 0.7                       | 67.51              | 119.01             | 119.01             | 0.999          |
| 1.0                       | 64.63              | 124.80             | 124.80             | 0.99833        |
| 1.5                       | 64.25              | 119.87             | 129.21             | 0.99878        |
| 2.0                       | 63.67              | 121.96             | 125.33             | 0.99742        |
| 2.5                       | 64.42              | 124.13             | 126.05             | 0.99857        |

**Supplementary Movie S1.** Intense stress-ML from Na<sub>2</sub>MgGeO<sub>4</sub>:0.004Mn<sup>2+</sup>.

## References

- 1 V. Singh, V. Natarajan, J. J. Zhu, *Opt. Mater.*, 2007, **30**, 468-472.
- 2 M. Y. Peng, X. W. Yin, P. A. Tanner, M. G. Brik, P. F. Li, *Chem. Mater.*, 2015, **27**, 2938-2945.
- 3 W. N. Wang, W. Widiyastuti, O. Takashi, I. W. Lenggoro and K. Okuyama, *Chem. Mater.*, 2007, **19**, 1723-1730.
